# Supplementary material
Source: PubMed Central journal article supplement (PMC4392920)
Supplement: supp_db14-0318_DB140318SupplementaryData.pdf [file supp_db14-0318_DB140318SupplementaryData.pdf]

SUPPLEMENTARY DATA

**Supplementary Table 1.** Nineteen independent genetic variants associated with fasting insulin as reported in the most recent Meta-Analysis of Glucose and Insulin Consortium (MAGIC) genome wide association study (1).

| <b>variant</b> | <b>Chr</b> | <b>Position</b> | <b>Gene</b>           | <b>Alleles<br/>(effect/other)</b> | <b>EAF</b> |
|----------------|------------|-----------------|-----------------------|-----------------------------------|------------|
| rs10195252     | 2          | 165221337       | <i>GRB14</i>          | T/C                               | 0.6        |
| rs1167800      | 7          | 75014132        | <i>HIP1</i>           | A/G                               | 0.54       |
| rs1421085      | 16         | 52358455        | <i>FTO</i>            | C/T                               | 0.42       |
| rs1530559      | 2          | 135472099       | <i>YSK4</i>           | A/G                               | 0.52       |
| rs17036328     | 3          | 12365484        | <i>PPARG</i>          | T/C                               | 0.86       |
| rs2126259      | 8          | 9222556         | <i>PPP1R3B</i>        | T/C                               | 0.11       |
| rs2745353      | 6          | 127494628       | <i>RSPO3</i>          | T/C                               | 0.51       |
| rs2943645      | 2          | 226807424       | <i>IRS1</i>           | T/C                               | 0.63       |
| rs3822072      | 4          | 89960292        | <i>FAM13A</i>         | A/G                               | 0.48       |
| rs459193       | 5          | 55842508        | <i>ANKRD55-MAP3K1</i> | G/A                               | 0.73       |
| rs4846565      | 1          | 217788727       | <i>LYPLAL1</i>        | G/A                               | 0.67       |
| rs4865796      | 5          | 53308421        | <i>ARL15</i>          | A/G                               | 0.67       |
| rs6822892      | 4          | 157954125       | <i>PDGFC</i>          | A/G                               | 0.68       |
| rs6912327      | 6          | 34872900        | <i>UHRF1BP1</i>       | T/C                               | 0.8        |
| rs731839       | 19         | 38590905        | <i>PEPD</i>           | G/A                               | 0.34       |
| rs7903146      | 10         | 114748339       | <i>TCF7L2</i>         | C/T                               | 0.72       |
| rs974801       | 4          | 106290513       | <i>TET2</i>           | G/A                               | 0.38       |
| rs780094       | 2          | 27594741        | <i>GCKR</i>           | C/T                               | 0.61       |
| rs35767        | 12         | 101399699       | <i>IGF1</i>           | G/A                               | 0.82       |

SUPPLEMENTARY DATA

**Supplementary Table 2.** 32 variants associated with BMI from the Genetic Investigation of ANthropometric Traits (GIANT) consortium (2).

| variant    | Chr | Position    | Gene            | Alleles (effect/other) | EAF  |
|------------|-----|-------------|-----------------|------------------------|------|
| rs2867125  | 2   | 612,827     | <i>TMEM18</i>   | C/T                    | 0.83 |
| rs571312   | 18  | 55,990,749  | <i>MC4R</i>     | A/C                    | 0.24 |
| rs10938397 | 4   | 44,877,284  | <i>GNPDA2</i>   | G/A                    | 0.43 |
| rs10767664 | 11  | 27,682,562  | <i>BDNF</i>     | A/T                    | 0.78 |
| rs2815752  | 1   | 72,585,028  | <i>NEGR1</i>    | A/G                    | 0.61 |
| rs7359397  | 16  | 28,793,160  | <i>SH2B1</i>    | T/C                    | 0.4  |
| rs9816226  | 3   | 187,317,193 | <i>ETV5</i>     | T/A                    | 0.82 |
| rs3817334  | 11  | 47,607,569  | <i>MTCH2</i>    | T/C                    | 0.41 |
| rs29941    | 19  | 39,001,372  | <i>KCTD15</i>   | G/A                    | 0.67 |
| rs543874   | 1   | 176,156,103 | <i>SEC16B</i>   | G/A                    | 0.19 |
| rs987237   | 6   | 50,911,009  | <i>TFAP2B</i>   | G/A                    | 0.18 |
| rs7138803  | 12  | 48,533,735  | <i>FAIM2</i>    | A/G                    | 0.38 |
| rs10150332 | 14  | 79,006,717  | <i>NRXN3</i>    | C/T                    | 0.21 |
| rs713586   | 2   | 25,011,512  | <i>RBJ</i>      | C/T                    | 0.47 |
| rs12444979 | 16  | 19,841,101  | <i>GPRC5B</i>   | C/T                    | 0.87 |
| rs2241423  | 15  | 65,873,892  | <i>MAP2K5</i>   | G/A                    | 0.78 |
| rs2287019  | 19  | 50,894,012  | <i>QPCTL</i>    | C/T                    | 0.8  |
| rs1514175  | 1   | 74,764,232  | <i>TNNI3K</i>   | A/G                    | 0.43 |
| rs13107325 | 4   | 103,407,732 | <i>SLC39A8</i>  | T/C                    | 0.07 |
| rs2112347  | 5   | 75,050,998  | <i>FLJ35779</i> | T/G                    | 0.63 |
| rs10968576 | 9   | 28,404,339  | <i>LRRN6C</i>   | G/A                    | 0.31 |
| rs3810291  | 19  | 52,260,843  | <i>TMEM160</i>  | A/G                    | 0.67 |
| rs887912   | 2   | 59,156,381  | <i>FANCL</i>    | T/C                    | 0.29 |
| rs13078807 | 3   | 85,966,840  | <i>CADM2</i>    | G/A                    | 0.2  |
| rs11847697 | 14  | 29,584,863  | <i>PRKD1</i>    | T/C                    | 0.04 |
| rs2890652  | 2   | 142,676,401 | <i>LRP1B</i>    | C/T                    | 0.18 |
| rs1555543  | 1   | 96,717,385  | <i>PTBP2</i>    | C/A                    | 0.59 |
| rs4771122  | 13  | 26,918,180  | <i>MTIF3</i>    | G/A                    | 0.24 |
| rs4836133  | 5   | 124,360,002 | <i>ZNF608</i>   | A/C                    | 0.48 |
| rs4929949  | 11  | 8,561,169   | <i>RPL27A</i>   | C/T                    | 0.52 |
| rs206936   | 6   | 34,410,847  | <i>NUDT3</i>    | G/A                    | 0.21 |

SUPPLEMENTARY DATA

**Supplementary Table 3.** Details of metabolic disease outcomes.

| Metabolic disease outcomes            | N studies | N individuals per study | Ethnicity        | Covariates                                                              | Trait definition/measurement                                                                                                                                                                                                                           | Range of age mean across studies | Range of BMI mean across studies | REF (PMCID) |
|---------------------------------------|-----------|-------------------------|------------------|-------------------------------------------------------------------------|--------------------------------------------------------------------------------------------------------------------------------------------------------------------------------------------------------------------------------------------------------|----------------------------------|----------------------------------|-------------|
| Type 2 diabetes                       | 12        | 269-1,924 cases         | European descent | Study-specific covariates, including indicators of population structure | Doctor diagnosed diabetes without insulin treatment in the first year and for most studies includes exclusion of individuals with GAD antibodies and monogenic forms of diabetes based on clinical criteria                                            | 44-68                            | 26-31                            | PMC3442244  |
| Coronary artery disease               | 14        | 278- 6640 cases         | European descent | sex and age                                                             | 1 artery with >50% stenosis in angiography, MI based on ECG and enzymes, PTCA or CABG                                                                                                                                                                  | 42-75                            | 27-32                            | PMC3679547  |
| Systolic and diastolic blood pressure | 29        | 562-8096                | European descent | age, age2, sex, BMI and other appropriate covariates (e.g. pc)          | Blood pressure was measured using either an automated machine or a mercury column sphygmomanometer on upper arm with the subject in the sitting position after sitting quietly for 5 minutes, and the average of 2 measures was used for the analyses. | 31-72                            | 24-28                            | PMC3340926  |
| cIMT                                  | 9         | 1,054-7,767             | European descent | age, sex and other appropriate covariates (e.g. pc)                     | Summarized as the mean of the maximum of several measurements. For most studies, this was an average of multiple measurements from both the left and right arteries using high-resolution B-mode ultrasonography                                       | 43-76                            | 25-29                            | PMC3257519  |
| Carotid plaque                        | 7         | 1,054-7,767             | European descent | age, sex and other appropriate covariates (e.g. pc)                     | Either the presence of plaque or the proxy measure of stenosis >25% in carotid artery using high-resolution B-mode ultrasonography                                                                                                                     | 43-76                            | 25-29                            | PMC3257519  |

SUPPLEMENTARY DATA

**Supplementary Table 4.** Results of genotype risk score analysis.

| Category                                                     | Trait                                   | Unit        | FI (18 variants)*        |                           | FI cluster 1              |                           | FI cluster 2 |                           | PPPIR3B |                           | FTO    |                           | GCKR                       |                           | BMI variants) (32)        |                            |
|--------------------------------------------------------------|-----------------------------------------|-------------|--------------------------|---------------------------|---------------------------|---------------------------|--------------|---------------------------|---------|---------------------------|--------|---------------------------|----------------------------|---------------------------|---------------------------|----------------------------|
|                                                              |                                         |             | beta                     | p                         | beta                      | p                         | beta         | p                         | beta    | p                         | beta   | p                         | beta                       | P                         | beta                      | p                          |
| Non-disease metabolic traits of monogenic insulin resistance | SHBG (BMI adjusted)                     | natural log | -0.004                   | <b>5x10<sup>-5</sup></b>  | -0.010                    | <b>9x10<sup>-13</sup></b> | 0.003        | 0.2                       | -0.024  | <b>4x10<sup>-4</sup></b>  | 0.008  | 0.08                      | 0.032                      | <b>3x10<sup>-12</sup></b> | NA                        | NA                         |
|                                                              | HDL-C                                   | SD          | -0.015                   | <b>3x10<sup>-32</sup></b> | -0.020                    | <b>7x10<sup>-37</sup></b> | -0.003       | 0.2                       | -0.073  | <b>1x10<sup>-22</sup></b> | -0.021 | <b>3x10<sup>-5</sup></b>  | 0.011                      | 0.03                      | -0.010                    | <b>4x10<sup>-23</sup></b>  |
|                                                              | Adiponectin (BMI adjusted)              | log         | -0.011                   | <b>2x10<sup>-19</sup></b> | -0.015                    | <b>2x10<sup>-26</sup></b> | -0.005       | 0.03                      | -0.014  | 0.07                      | 0.003  | 0.4                       | 0.016                      | <b>5x10<sup>-4</sup></b>  | NA                        | NA                         |
|                                                              | BMI                                     | SD          | -0.002                   | 0.1                       | -0.008                    | <b>7x10<sup>-8</sup></b>  | 0.012        | <b>3x10<sup>-6</sup></b>  | 0.004   | 0.6                       | 0.080  | <b>1x10<sup>-62</sup></b> | 0.008                      | 0.09                      | 0.036                     | <b>7x10<sup>-299</sup></b> |
|                                                              | VATSAT ratio                            | z-score     | 0.010                    | <b>9x10<sup>-6</sup></b>  | 0.015                     | <b>6x10<sup>-7</sup></b>  | 0.006        | 0.2                       | 0.010   | 0.3                       | -0.014 | 0.2                       | -0.016                     | 0.1                       | -0.009                    | <b>1x10<sup>-6</sup></b>   |
|                                                              | CT measured hepatic steatosis           | SD          | 0.000                    | 0.9                       | 0.021                     | <b>3x10<sup>-4</sup></b>  | -0.015       | 0.1                       | -0.251  | <b>6x10<sup>-16</sup></b> | 0.026  | 0.1                       | -0.065                     | <b>2x10<sup>-4</sup></b>  | -0.007                    | 0.04                       |
|                                                              | ALT                                     | log10       | 0.002                    | <b>3x10<sup>-6</sup></b>  | 0.002                     | <b>3x10<sup>-5</sup></b>  | 0.001        | 0.2                       | 0.008   | 0.006                     | 0.002  | 0.3                       | 0.001                      | 0.7                       | 0.002                     | <b>2x10<sup>-6</sup></b>   |
| Triglyceride                                                 | SD                                      | 0.004       | <b>3x10<sup>-4</sup></b> | 0.018                     | <b>4x10<sup>-29</sup></b> | 0.002                     | 0.4          | 0.013                     | 0.09    | 0.011                     | 0.05   | -0.112                    | <b>7x10<sup>-125</sup></b> | 0.007                     | <b>2x10<sup>-12</sup></b> |                            |
| Metabolic disease and disease related outcomes               | Type 2 diabetes                         | OR          | 1.013                    | 0.006                     | 1.043                     | <b>5x10<sup>-13</sup></b> | 0.925        | <b>1x10<sup>-15</sup></b> | 1.050   | 0.07                      | 1.110  | <b>1x10<sup>-9</sup></b>  | 1.040                      | 0.02                      | 1.021                     | <b>1x10<sup>-12</sup></b>  |
|                                                              | Coronary artery disease                 | OR          | 1.014                    | <b>7x10<sup>-9</sup></b>  | 1.013                     | <b>1x10<sup>-5</sup></b>  | 1.016        | <b>4x10<sup>-4</sup></b>  | 1.005   | 0.6                       | 1.014  | 0.1                       | 1.017                      | 0.09                      | 1.010                     | <b>1x10<sup>-7</sup></b>   |
|                                                              | Systolic blood pressure (BMI adjusted)  | mmHg        | 0.097                    | <b>1x10<sup>-4</sup></b>  | 0.135                     | <b>2x10<sup>-5</sup></b>  | 0.046        | 0.4                       | 0.146   | 0.4                       | -0.120 | 0.2                       | -0.099                     | 0.3                       | NA                        | NA                         |
|                                                              | Diastolic blood pressure (BMI adjusted) | mmHg        | 0.053                    | <b>9x10<sup>-4</sup></b>  | 0.075                     | <b>2x10<sup>-4</sup></b>  | 0.017        | 0.6                       | 0.103   | 0.3                       | -0.142 | 0.02                      | -0.038                     | 0.5                       | NA                        | NA                         |
|                                                              | cIMT                                    | log         | 0.000                    | 0.9                       | 0.000                     | 0.7                       | 0.000        | 1                         | -0.001  | 0.6                       | 0.002  | 0.1                       | 0.001                      | 0.3                       | 0.001                     | 0.06                       |
| Carotid plaques                                              | OR                                      | 1.005       | 0.4                      | 1.005                     | 0.5                       | 1.004                     | 0.7          | 1.012                     | 0.7     | 1.003                     | 0.9    | 0.997                     | 0.9                        | 1.000                     | 0.9                       |                            |

Beta is the effect size per fasting insulin increasing allele on each trait.

Statistically significant P values (< 0.001) are shown in bold.

FI cluster 1 and 2 refer to the clusters of 11 and 5 fasting insulin variants respectively, from the hierarchical cluster analysis.

SD: Standard deviation; OR: odds ratio; VATSAT ratio: visceral-to-subcutaneous adipose tissue ratio.

NA in the table indicates that data uncorrected for BMI was not available.

\* The genetic risk score excludes the genetic variant at *FTO* as it has a primary effect on BMI.

SUPPLEMENTARY DATA

**Supplementary Table 5.** Sensitivity analysis.

| Trait                                                               | Unit        | beta   | p                   | W1-beta | W1-p                | W2-beta | W2-p                | W3-beta | W3-p                 |
|---------------------------------------------------------------------|-------------|--------|---------------------|---------|---------------------|---------|---------------------|---------|----------------------|
| <b>Non-disease metabolic traits of monogenic insulin resistance</b> |             |        |                     |         |                     |         |                     |         |                      |
| <b>SHBG (BMI adjusted)</b>                                          | natural log | -0.010 | 9x10 <sup>-13</sup> | -0.007  | 1x10 <sup>-7</sup>  | -0.007  | 1x10 <sup>-14</sup> | -0.006  | 4x10 <sup>-6</sup>   |
| <b>HDL-C</b>                                                        | SD          | -0.020 | 7x10 <sup>-37</sup> | -0.019  | 1x10 <sup>-36</sup> | -0.014  | 1x10 <sup>-37</sup> | -0.017  | 1 x10 <sup>-34</sup> |
| <b>Adiponectin (BMI adjusted)</b>                                   | log         | -0.015 | 2x10 <sup>-26</sup> | -0.011  | 3x10 <sup>-16</sup> | -0.010  | 3x10 <sup>-26</sup> | -0.011  | 4 x10 <sup>-17</sup> |
| <b>BMI</b>                                                          | SD          | -0.008 | 7x10 <sup>-8</sup>  | -0.003  | 0.02                | -0.006  | 4x10 <sup>-09</sup> | -0.004  | 0.005                |
| <b>VATSAT ratio</b>                                                 | z-score     | 0.015  | 6x10 <sup>-7</sup>  | 0.011   | 8x10 <sup>-6</sup>  | 0.010   | 5x10 <sup>-07</sup> | 0.011   | 2x10 <sup>-5</sup>   |
| <b>CT measured hepatic steatosis</b>                                | SD          | 0.021  | 3x10 <sup>-4</sup>  | 0.017   | 0.002               | 0.014   | 3x10 <sup>-4</sup>  | 0.011   | 0.03                 |
| <b>ALT</b>                                                          | log10       | 0.002  | 3x10 <sup>-5</sup>  | 0.003   | 3x10 <sup>-7</sup>  | 0.002   | 1x10 <sup>-05</sup> | 0.002   | 8x10 <sup>-7</sup>   |
| <b>Triglyceride</b>                                                 | SD          | 0.018  | 4x10 <sup>-29</sup> | 0.005   | 2x10 <sup>-4</sup>  | 0.012   | 1x10 <sup>-30</sup> | 0.002   | 0.1                  |
| <b>Metabolic disease and disease related outcomes</b>               |             |        |                     |         |                     |         |                     |         |                      |
| <b>Type 2 diabetes</b>                                              | OR          | 1.043  | 5x10 <sup>-13</sup> | 1.027   | 1x10 <sup>-6</sup>  | 1.031   | 1x10 <sup>-15</sup> | 1.032   | 5x10 <sup>-9</sup>   |
| <b>Coronary artery disease</b>                                      | OR          | 1.013  | 1x10 <sup>-5</sup>  | 1.013   | 2x10 <sup>-7</sup>  | 1.008   | 3x10 <sup>-05</sup> | 0.013   | 2x10 <sup>-7</sup>   |
| <b>Systolic blood pressure (BMI adjusted)</b>                       | mmHg        | 0.135  | 2x10 <sup>-5</sup>  | 0.109   | 3x10 <sup>-4</sup>  | 0.096   | 4x10 <sup>-06</sup> | 0.108   | 3x10 <sup>-4</sup>   |
| <b>Diastolic blood pressure (BMI adjusted)</b>                      | mmHg        | 0.075  | 2x10 <sup>-4</sup>  | 0.059   | 1x10 <sup>-3</sup>  | 0.052   | 9x10 <sup>-05</sup> | 0.060   | 9x10 <sup>-4</sup>   |
| <b>cIMT</b>                                                         | log         | 0.000  | 0.70                | -0.000  | 0.7                 | 0.000   | 0.7                 | -0.000  | 0.8                  |
| <b>Carotid plaques</b>                                              | OR          | 1.005  | 0.50                | 1.006   | 0.3                 | 1.004   | 0.4                 | 1.007   | 0.3                  |

SUPPLEMENTARY DATA

**Supplementary Table 6.** Results of genotype risk score analysis.

| Category                                                     | Trait                                   | Unit        | FI cluster 1 |                           | FI cluster 1 excluding <i>IRS1</i> |                           |
|--------------------------------------------------------------|-----------------------------------------|-------------|--------------|---------------------------|------------------------------------|---------------------------|
|                                                              |                                         |             | beta         | p                         | beta                               | p                         |
| Non-disease metabolic traits of monogenic insulin resistance | SHBG (BMI adjusted)                     | natural log | -0.010       | <b>9x10<sup>-13</sup></b> | -0.009                             | <b>4x10<sup>-10</sup></b> |
|                                                              | HDL-C                                   | SD          | -0.020       | <b>7x10<sup>-37</sup></b> | -0.019                             | <b>5x10<sup>-30</sup></b> |
|                                                              | Adiponectin (BMI adjusted)              | log         | -0.015       | <b>2x10<sup>-26</sup></b> | -0.014                             | <b>5x10<sup>-22</sup></b> |
|                                                              | BMI                                     | SD          | -0.008       | <b>7x10<sup>-8</sup></b>  | -0.008                             | <b>2x10<sup>-6</sup></b>  |
|                                                              | VATSAT ratio                            | z-score     | 0.015        | <b>6x10<sup>-7</sup></b>  | 0.013                              | <b>3x10<sup>-5</sup></b>  |
|                                                              | CT measured hepatic steatosis           | SD          | 0.021        | <b>3x10<sup>-4</sup></b>  | 0.021                              | <b>6x10<sup>-4</sup></b>  |
|                                                              | ALT                                     | log10       | 0.002        | <b>3x10<sup>-5</sup></b>  | 0.002                              | <b>7x10<sup>-5</sup></b>  |
|                                                              | Triglyceride                            | SD          | 0.018        | <b>4x10<sup>-29</sup></b> | 0.017                              | <b>9x10<sup>-24</sup></b> |
| Metabolic disease and disease related outcomes               | Type 2 diabetes                         | OR          | 1.043        | <b>5x10<sup>-13</sup></b> | 1.039                              | <b>3x10<sup>-10</sup></b> |
|                                                              | Coronary artery disease                 | OR          | 1.013        | <b>1x10<sup>-5</sup></b>  | 1.013                              | <b>4x10<sup>-5</sup></b>  |
|                                                              | Systolic blood pressure (BMI adjusted)  | mmHg        | 0.135        | <b>2x10<sup>-5</sup></b>  | 0.129                              | <b>1x10<sup>-4</sup></b>  |
|                                                              | Diastolic blood pressure (BMI adjusted) | mmHg        | 0.075        | <b>2x10<sup>-4</sup></b>  | 0.072                              | <b>6x10<sup>-4</sup></b>  |
|                                                              | cIMT                                    | log         | 0.000        | 0.7                       | 0.000                              | 0.8                       |
|                                                              | Carotid plaques                         | OR          | 1.005        | 0.5                       | 1.003                              | 0.7                       |

Beta is the effect size per fasting insulin increasing allele on each trait.

Statistically significant P values (< 0.001) are shown in bold.

FI cluster 1 refers to the clusters of 11 fasting insulin variants from the hierarchical cluster analysis.

SD: Standard deviation; OR: odds ratio; VATSAT ratio: visceral-to-subcutaneous adipose tissue ratio.

## SUPPLEMENTARY DATA

**Supplementary Figure 1.** The estimated cumulative effect of the 11 “lipodystrophic insulin resistance” and 32 BMI variants on risk of type 2 diabetes and coronary artery disease. We used package “PredictABEL” in R (3) to simulate 2 separate genotype dataset for 50,000 individuals based on allele frequencies of 11 “lipodystrophic insulin resistance” and 32 BMI variants. We assumed (i) the genetic variants are independent (no linkage disequilibrium), (ii) there is no interaction between genetic variants, (iii) all genotypes are in Hardy-Weinberg equilibrium and (iv) the combined effect of genetic variants on disease risk follows “log additive” risk model. Individuals were grouped based on the number of “lipodystrophic insulin resistance” alleles (**a** and **c**) and BMI increasing alleles (**b** and **d**). The odds ratio of type 2 diabetes and coronary artery disease for each group is plotted (black circles). The superimposed histogram represents the proportion of samples with number of “lipodystrophic insulin resistance” or BMI increasing variants.

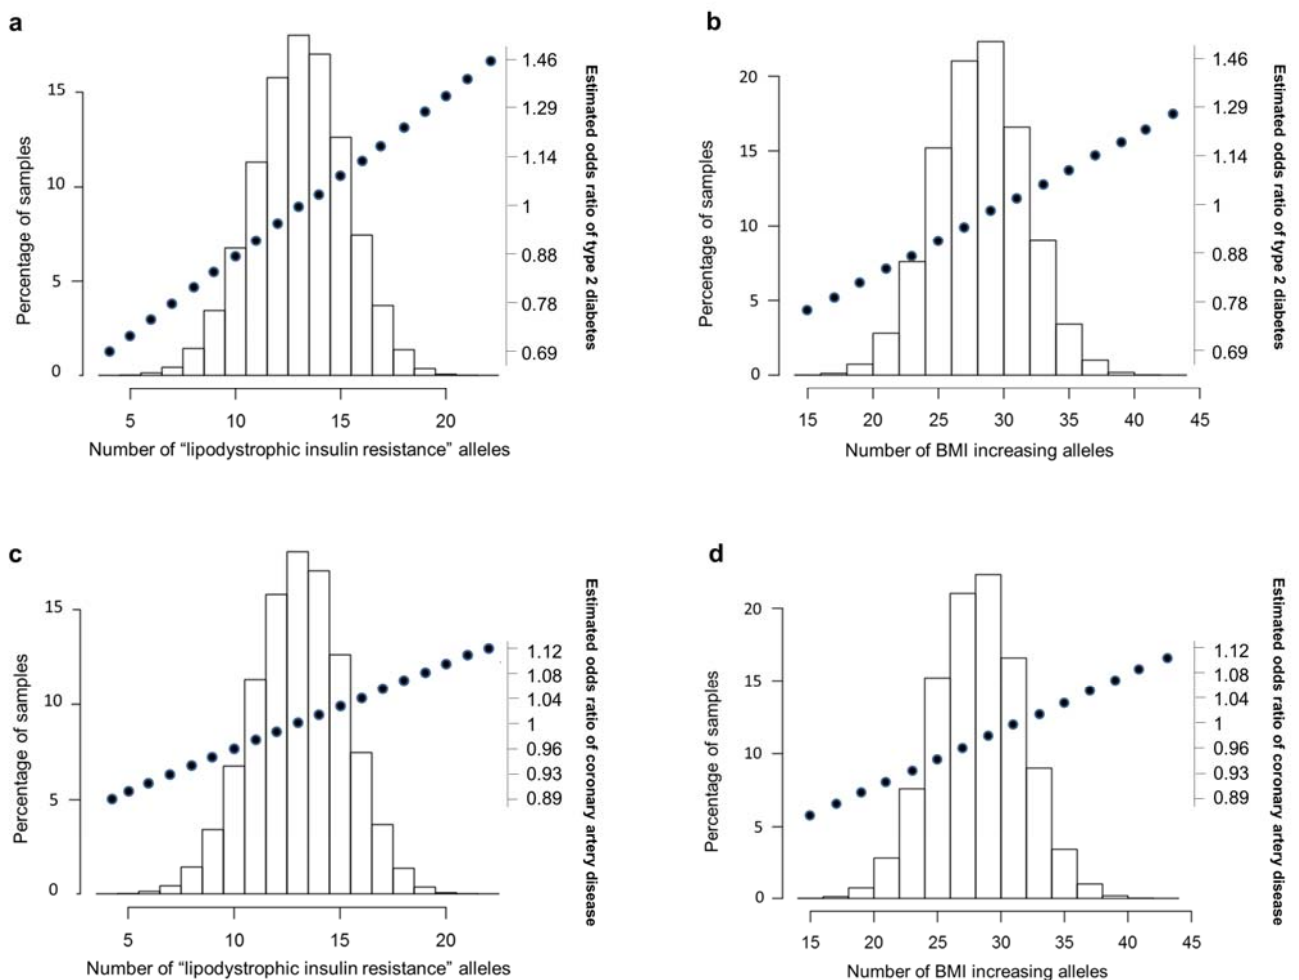

## SUPPLEMENTARY DATA

### References:

1. Scott RA, Lagou V, Welch RP, Wheeler E, Montasser ME, Luan J, Magi R, Strawbridge RJ, Rehnberg E, Gustafsson S, Kanoni S, Rasmussen-Torvik LJ, Yengo L, Lecoeur C, Shungin D, Sanna S, Sidore C, Johnson PC, Jukema JW, Johnson T, Mahajan A, Verweij N, Thorleifsson G, Hottenga JJ, Shah S, Smith AV, Sennblad B, Gieger C, Salo P, Perola M, Timpson NJ, Evans DM, Pourcain BS, Wu Y, Andrews JS, Hui J, Bielak LF, Zhao W, Horikoshi M, Navarro P, Isaacs A, O'Connell JR, Stirrups K, Vitart V, Hayward C, Esko T, Mihailov E, Fraser RM, Fall T, Voight BF, Raychaudhuri S, Chen H, Lindgren CM, Morris AP, Rayner NW, Robertson N, Rybin D, Liu CT, Beckmann JS, Willems SM, Chines PS, Jackson AU, Kang HM, Stringham HM, Song K, Tanaka T, Peden JF, Goel A, Hicks AA, An P, Muller-Nurasyid M, Franco-Cereceda A, Folkersen L, Marullo L, Jansen H, Oldehinkel AJ, Bruinenberg M, Pankow JS, North KE, Forouhi NG, Loos RJ, Edkins S, Varga TV, Hallmans G, Oksa H, Antonella M, Nagaraja R, Trompet S, Ford I, Bakker SJ, Kong A, Kumari M, Gigante B, Herder C, Munroe PB, Caulfield M, Antti J, Mangino M, Small K, Miljkovic I, Liu Y, Atalay M, Kiess W, James AL, Rivadeneira F, Uitterlinden AG, Palmer CN, Doney AS, Willemsen G, Smit JH, Campbell S, Polasek O, Bonnycastle LL, Hercberg S, Dimitriou M, Bolton JL, Fowkes GR, Kovacs P, Lindstrom J, Zemunik T, Bandinelli S, Wild SH, Basart HV, Rathmann W, Grallert H, Maerz W, Kleber ME, Boehm BO, Peters A, Pramstaller PP, Province MA, Borecki IB, Hastie ND, Rudan I, Campbell H, Watkins H, Farrall M, Stumvoll M, Ferrucci L, Waterworth DM, Bergman RN, Collins FS, Tuomilehto J, Watanabe RM, de Geus EJ, Penninx BW, Hofman A, Oostra BA, Psaty BM, Vollenweider P, Wilson JF, Wright AF, Hovingh GK, Metspalu A, Uusitupa M, Magnusson PK, Kyvik KO, Kaprio J, Price JF, Dedoussis GV, Deloukas P, Meneton P, Lind L, Boehnke M, Shuldiner AR, van Duijn CM, Morris AD, Toenjes A, Peyser PA, Beilby JP, Korner A, Kuusisto J, Laakso M, Bornstein SR, Schwarz PE, Lakka TA, Rauramaa R, Adair LS, Smith GD, Spector TD, Illig T, de Faire U, Hamsten A, Gudnason V, Kivimaki M, Hingorani A, Keinanen-Kiukaanniemi SM, Saaristo TE, Boomsma DI, Stefansson K, van der Harst P, Dupuis J, Pedersen NL, Sattar N, Harris TB, Cucca F, Ripatti S, Salomaa V, Mohlke KL, Balkau B, Froguel P, Pouta A, Jarvelin MR, Wareham NJ, Bouatia-Naji N, McCarthy MI, Franks PW, Meigs JB, Teslovich TM, Florez JC, Langenberg C, Ingelsson E, Prokopenko I, Barroso I: Large-scale association analyses identify new loci influencing glycemic traits and provide insight into the underlying biological pathways. *Nat Genet* 2012;44:991-1005
2. Speliotes EK, Willer CJ, Berndt SI, Monda KL, Thorleifsson G, Jackson AU, Lango Allen H, Lindgren CM, Luan J, Magi R, Randall JC, Vedantam S, Winkler TW, Qi L, Workalemahu T, Heid IM, Steinthorsdottir V, Stringham HM, Weedon MN, Wheeler E, Wood AR, Ferreira T, Weyant RJ, Segre AV, Estrada K, Liang L, Nemesh J, Park JH, Gustafsson S, Kilpelainen TO, Yang J, Bouatia-Naji N, Esko T, Feitosa MF, Kutalik Z, Mangino M, Raychaudhuri S, Scherag A, Smith AV, Welch R, Zhao JH, Aben KK, Absher DM, Amin N, Dixon AL, Fisher E, Glazer NL, Goddard ME, Heard-Costa NL, Hoesel V, Hottenga JJ, Johansson A, Johnson T, Ketkar S, Lamina C, Li S, Moffatt MF, Myers RH, Narisu N, Perry JR, Peters MJ, Preuss M, Ripatti S, Rivadeneira F, Sandholt C, Scott LJ, Timpson NJ, Tyrer JP, van Wingerden S, Watanabe RM, White CC, Wiklund F, Barlassina C, Chasman DI, Cooper MN, Jansson JO, Lawrence RW, Pellikka N, Prokopenko I, Shi J, Thiering E, Alavere H, Alibrandi MT, Almgren P, Arnold AM, Aspelund T, Atwood LD, Balkau B, Balmforth AJ, Bennett AJ, Ben-Shlomo Y, Bergman RN, Bergmann S, Biebermann H, Blakemore AI, Boes T, Bonnycastle LL, Bornstein SR, Brown MJ, Buchanan TA, Busonero F, Campbell H, Cappuccio FP, Cavalcanti-Proenca C, Chen YD, Chen CM, Chines PS, Clarke R, Coin L, Connell J, Day IN, den Heijer M, Duan J, Ebrahim S, Elliott P, Elosua R, Eiriksdottir G, Erdos MR, Eriksson JG, Facheris MF, Felix SB, Fischer-Posovszky P, Folsom AR, Friedrich N, Freimer NB, Fu M, Gaget S, Gejman PV, Geus EJ, Gieger C, Gjesing AP, Goel A, Goyette P, Grallert H, Grassler J, Greenawalt DM, Groves CJ, Gudnason V, Guiducci C, Hartikainen AL, Hassanali N, Hall AS, Havulinna AS, Hayward C, Heath AC, Hengstenberg C, Hicks AA, Hinney A, Hofman A, Homuth G, Hui J, Igl W, Iribarren C, Isomaa B, Jacobs KB, Jarick I, Jewell E, John U, Jorgensen T, Jousilahti P, Jula A, Kaakinen M, Kajantie E, Kaplan LM, Kathiresan S, Kettunen J, Kinnunen L, Knowles JW, Kolcic I, Konig IR, Koskinen S, Kovacs P, Kuusisto J, Kraft P, Kvaloy K, Laitinen J, Lantieri O, Lanzani C, Launer LJ, Lecoeur C, Lehtimaki T, Lettre G, Liu J, Lokki ML, Lorentzon M, Luben RN, Ludwig B, Manunta P, Marek D, Marre M, Martin NG, McArdle WL, McCarthy A, McKnight B, Meitinger T, Melander O, Meyre D, Midthjell K, Montgomery GW, Morken MA, Morris AP, Mulic R, Ngwa JS, Nelis M, Neville MJ, Nyholt DR, O'Donnell CJ, O'Rahilly S, Ong KK, Oostra B, Pare G, Parker AN, Perola M, Pichler I, Pietilainen KH, Platou CG, Polasek O, Pouta A, Rafelt S, Raitakari



## SUPPLEMENTARY DATA

O, Rayner NW, Ridderstrale M, Rief W, Ruokonen A, Robertson NR, Rzehak P, Salomaa V, Sanders AR, Sandhu MS, Sanna S, Saramies J, Savolainen MJ, Scherag S, Schipf S, Schreiber S, Schunkert H, Silander K, Sinisalo J, Siscovick DS, Smit JH, Soranzo N, Sovio U, Stephens J, Surakka I, Swift AJ, Tammesoo ML, Tardif JC, Teder-Laving M, Teslovich TM, Thompson JR, Thomson B, Tonjes A, Tuomi T, van Meurs JB, van Ommen GJ, Vatin V, Viikari J, Visvikis-Siest S, Vitart V, Vogel CI, Voight BF, Waite LL, Wallaschofski H, Walters GB, Widen E, Wiegand S, Wild SH, Willemsen G, Witte DR, Witteman JC, Xu J, Zhang Q, Zgaga L, Ziegler A, Zitting P, Beilby JP, Farooqi IS, Hebebrand J, Huikuri HV, James AL, Kahonen M, Levinson DF, Macciardi F, Nieminen MS, Ohlsson C, Palmer LJ, Ridker PM, Stumvoll M, Beckmann JS, Boeing H, Boerwinkle E, Boomsma DI, Caulfield MJ, Chanock SJ, Collins FS, Cupples LA, Smith GD, Erdmann J, Froguel P, Gronberg H, Gyllensten U, Hall P, Hansen T, Harris TB, Hattersley AT, Hayes RB, Heinrich J, Hu FB, Hveem K, Illig T, Jarvelin MR, Kaprio J, Karpe F, Khaw KT, Kiemenev LA, Krude H, Laakso M, Lawlor DA, Metspalu A, Munroe PB, Ouwehand WH, Pedersen O, Penninx BW, Peters A, Pramstaller PP, Quertermous T, Reinehr T, Rissanen A, Rudan I, Samani NJ, Schwarz PE, Shuldiner AR, Spector TD, Tuomilehto J, Uda M, Uitterlinden A, Valle TT, Wabitsch M, Waeber G, Wareham NJ, Watkins H, Wilson JF, Wright AF, Zillikens MC, Chatterjee N, McCarroll SA, Purcell S, Schadt EE, Visscher PM, Assimes TL, Borecki IB, Deloukas P, Fox CS, Groop LC, Haritunians T, Hunter DJ, Kaplan RC, Mohlke KL, O'Connell JR, Peltonen L, Schlessinger D, Strachan DP, van Duijn CM, Wichmann HE, Frayling TM, Thorsteinsdottir U, Abecasis GR, Barroso I, Boehnke M, Stefansson K, North KE, McCarthy MI, Hirschhorn JN, Ingelsson E, Loos RJ: Association analyses of 249,796 individuals reveal 18 new loci associated with body mass index. *Nat Genet* 2010;42:937-948

3. Kundu S, Aulchenko YS, van Duijn CM, Janssens AC: PredictABEL: an R package for the assessment of risk prediction models. *European journal of epidemiology* 2011;26:261-264
